# Supplementary material for: Coumarin-based supramolecular gelator: a case of selective detection of F− and HP2O73−
Source: Royal Society of Chemistry journal article supplement (doi:10.1039/c4ra16342g), 2015-01-01

## Electronic Supporting Information

### Coumarin-based supramolecular gelator: A case of selective detection of $F^-$ and $HP_2O_7^{3-}$

Kumares Ghosh\* and Santanu Panja

Department of Chemistry, University of Kalyani, Kalyani-741235, India.

Email: ghosh\_k2003@yahoo.co.in

#### Change in emission of 1 in $CH_3CN$ containing 0.5% DMSO.

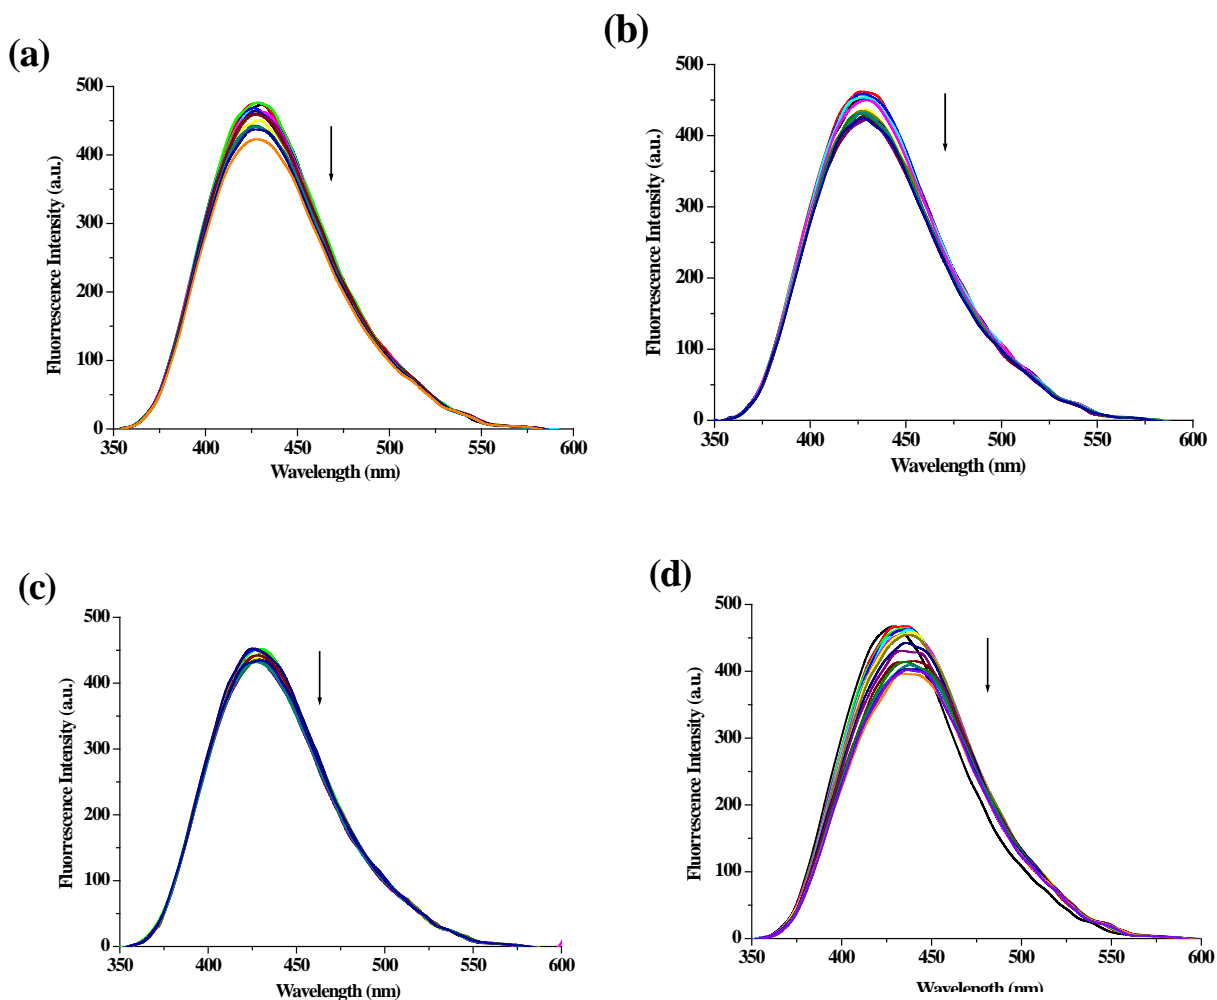

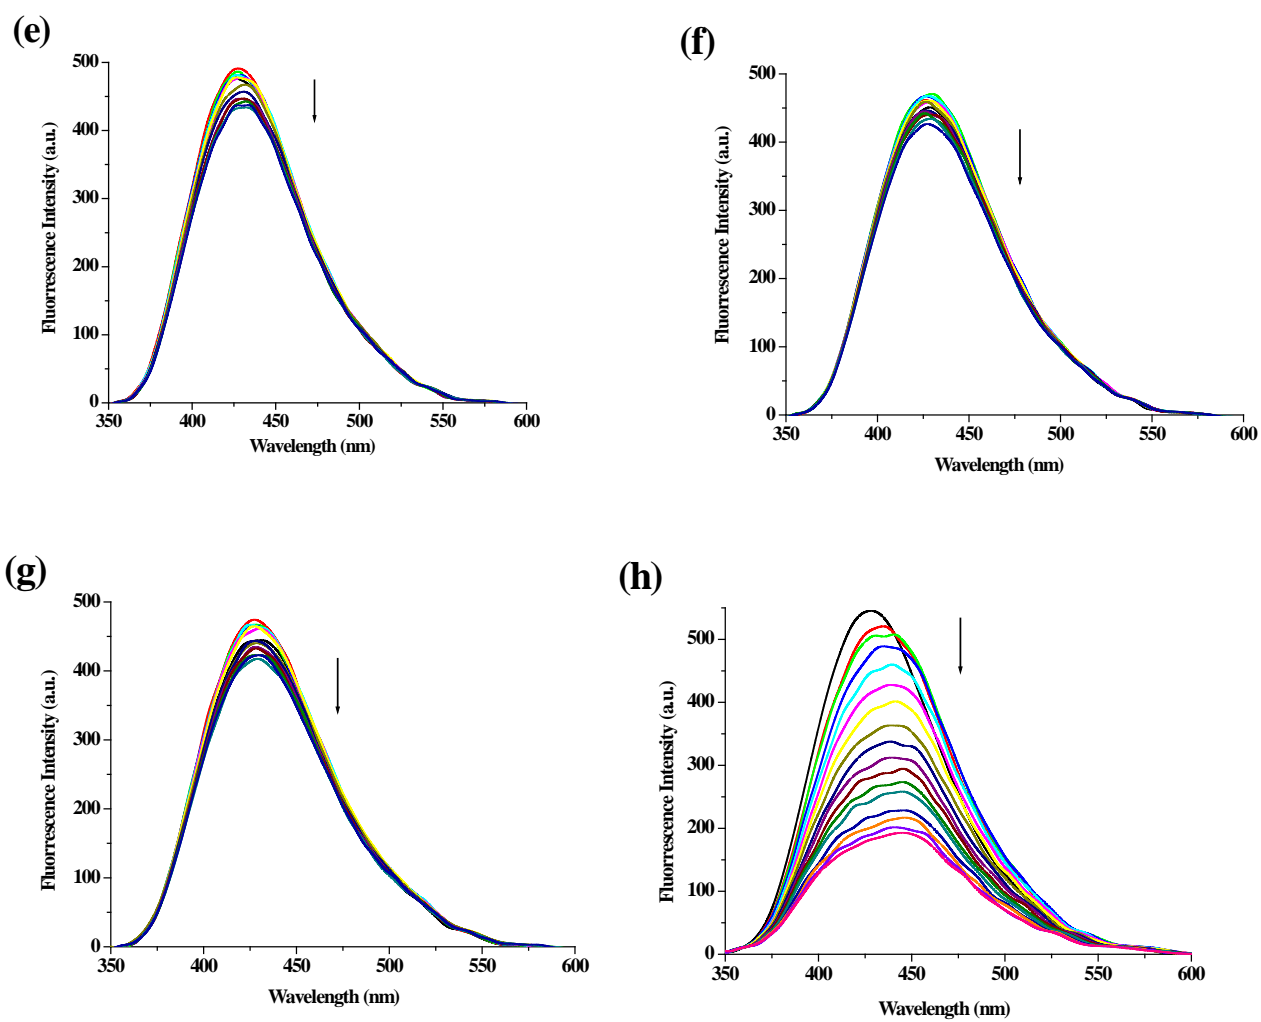

**Fig. 1S.** Change in emission of **1** ( $c = 1.94 \times 10^{-5} \text{ M}$ ) upon addition of 10 equiv. of (a)  $\text{Cl}^-$ , (b)  $\text{Br}^-$ , (c)  $\text{I}^-$ , (d)  $\text{AcO}^-$ , (e)  $\text{H}_2\text{PO}_4^-$ , (f)  $\text{NO}_3^-$ , (g)  $\text{HSO}_4^-$ , (h)  $\text{OH}^-$  in  $\text{CH}_3\text{CN}$  containing 0.5% DMSO.

## Change in absorbance of 1 in CH<sub>3</sub>CN containing 0.5% DMSO.

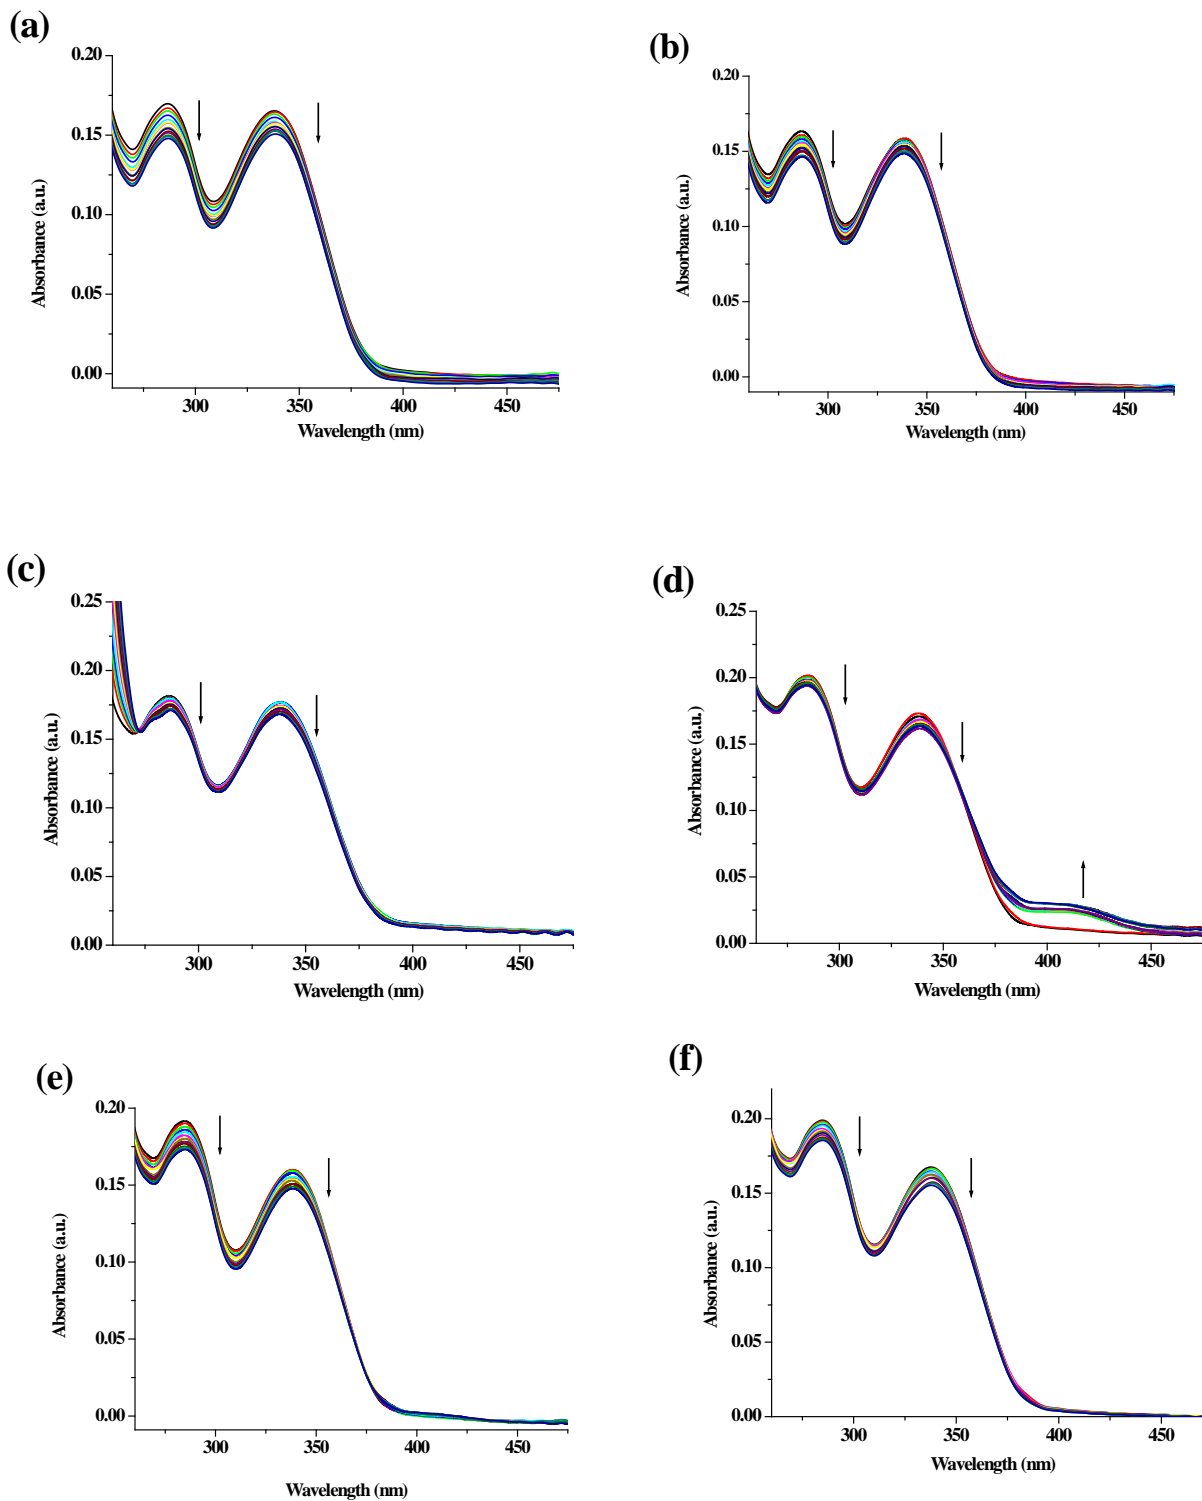

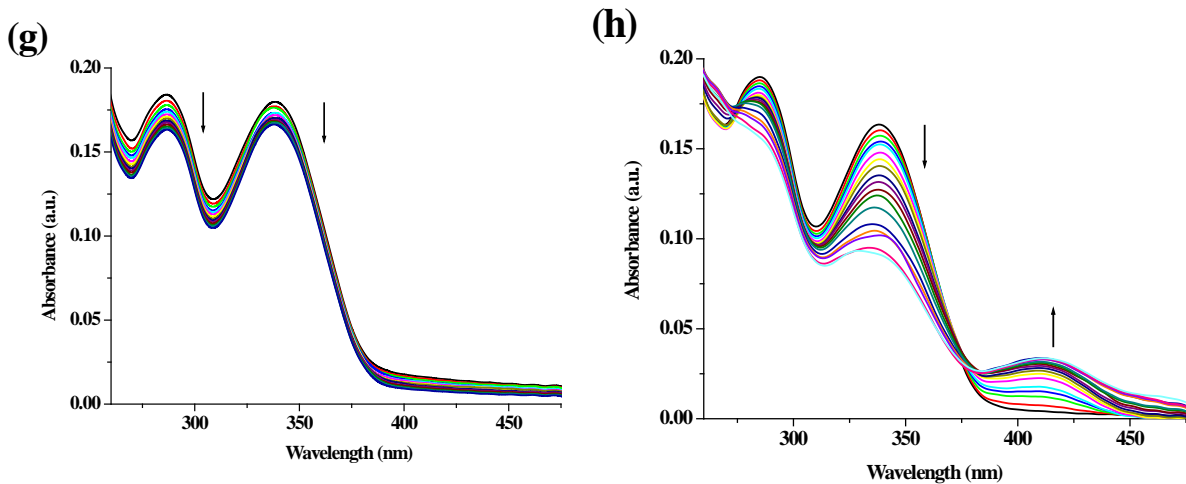

**Fig. 2S.** Change in absorbance of **1** ( $c = 1.94 \times 10^{-5} \text{ M}$ ) upon addition of 10 equiv. of (a)  $\text{Cl}^-$ , (b)  $\text{Br}^-$ , (c)  $\text{I}^-$ , (d)  $\text{AcO}^-$ , (e)  $\text{H}_2\text{PO}_4^-$ , (f)  $\text{NO}_3^-$ , (g)  $\text{HSO}_4^-$ , (h)  $\text{OH}^-$  in  $\text{CH}_3\text{CN}$  containing 0.5% DMSO.

### UV-VIS Job plot with $\text{HP}_2\text{O}_7^{3-}$ and $\text{F}^-$ .

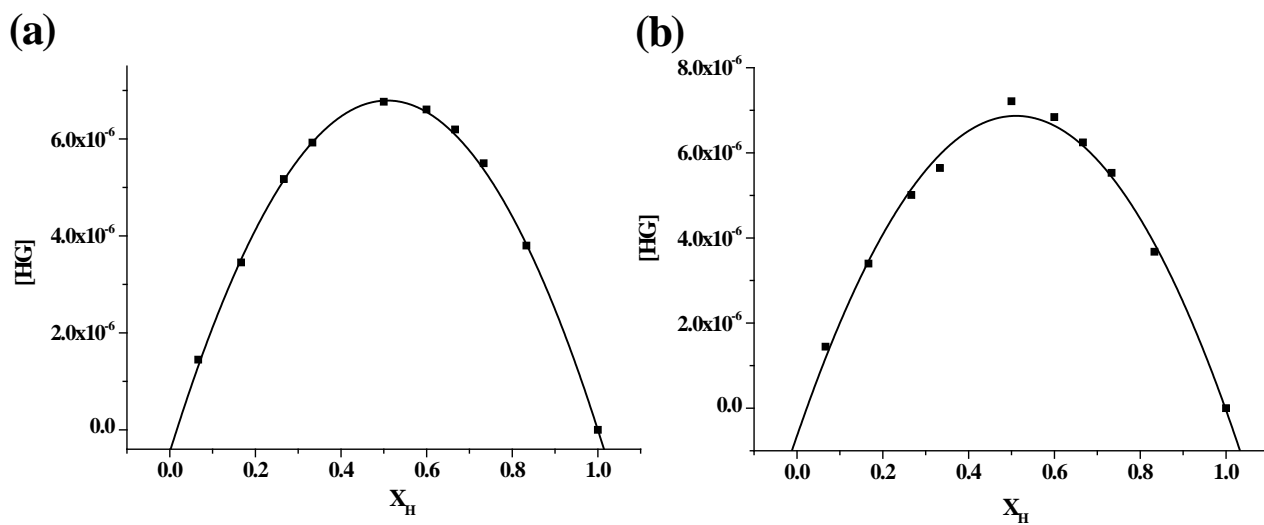

**Fig. 3S.** Job plots of **1** ( $c = 1.94 \times 10^{-5} \text{ M}$ ) with (a)  $\text{HP}_2\text{O}_7^{3-}$ , (b)  $\text{F}^-$ .

## Binding constant plots.

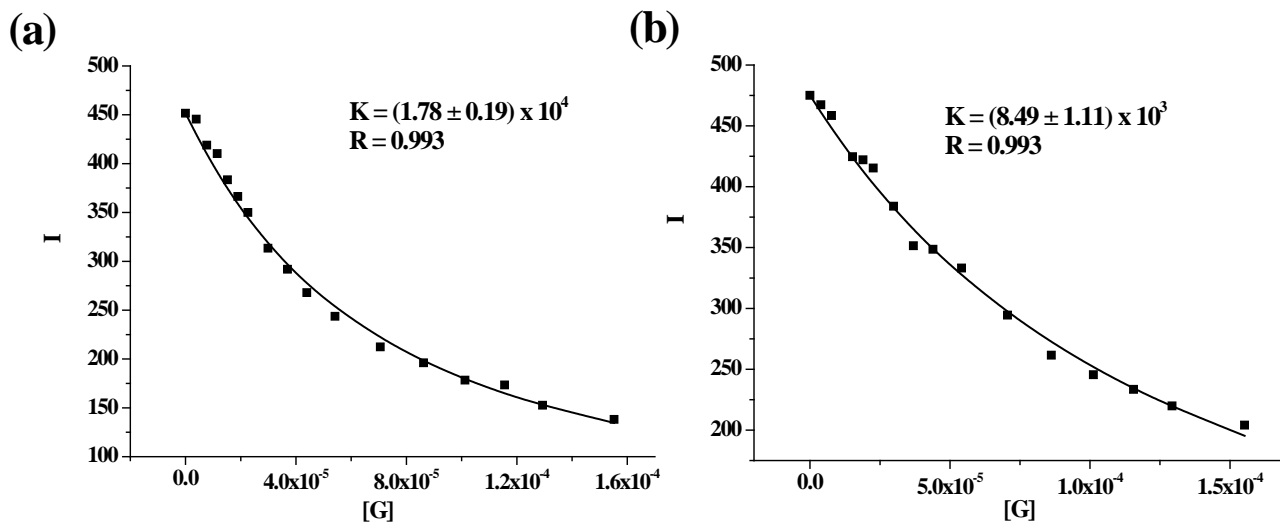

**Fig. 4S.** Non linear binding constant curve for **1** ( $c = 1.94 \times 10^{-5}$  M) with (a)  $\text{HP}_2\text{O}_7^{3-}$ , (b)  $\text{F}^-$  in  $\text{CH}_3\text{CN}$  containing 0.5% DMSO.

## Detection limit

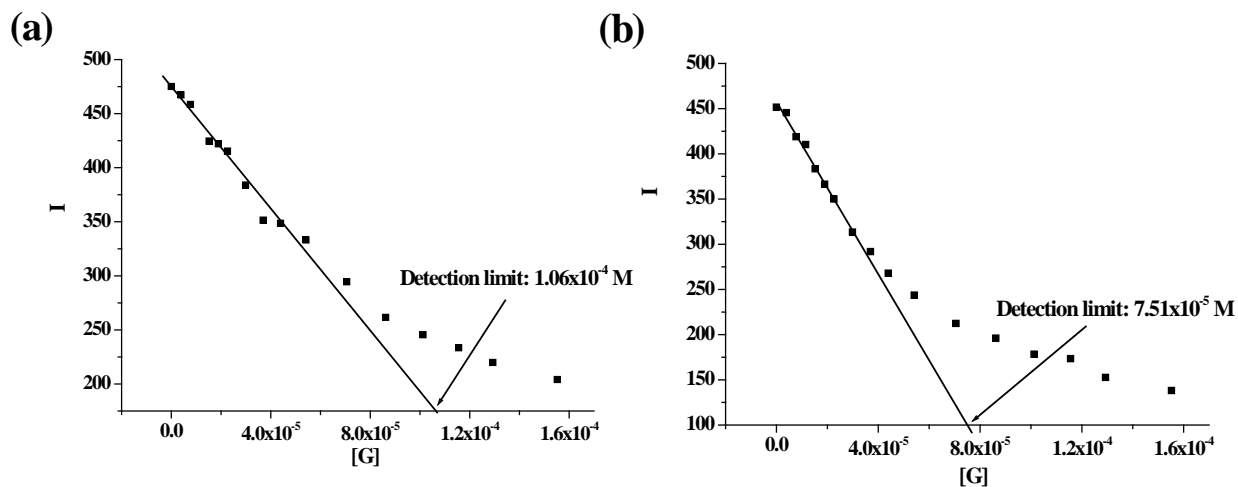

**Fig. 5S.** Detection limits of (a)  $\text{F}^-$  and (b)  $\text{HP}_2\text{O}_7^{3-}$  with **1** ( $c = 1.94 \times 10^{-5}$  M) in  $\text{CH}_3\text{CN}$  containing 0.5% DMSO.

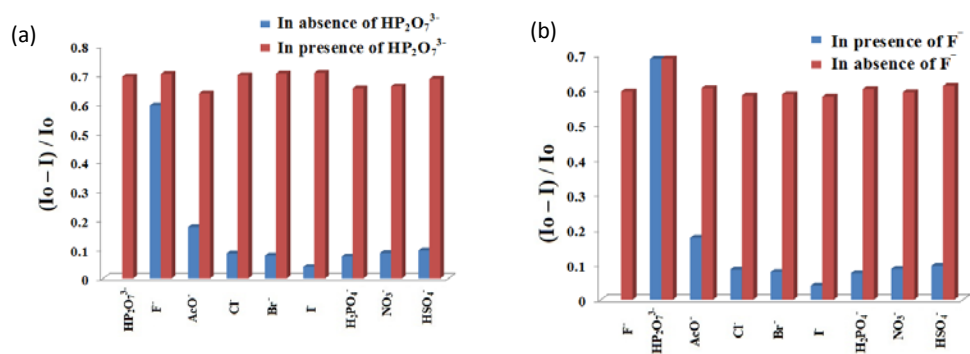

**Fig 6S.** Fluorescence response of **1** ( $c = 1.94 \times 10^{-5} \text{ M}$ ) upon addition of 10 equiv. amounts of (a)  $\text{HP}_2\text{O}_7^{3-}$  and (b)  $\text{F}^-$  ( $c = 7.76 \times 10^{-4} \text{ M}$ ) to the solution of **1** containing other anions in 10 equiv. amounts in  $\text{CH}_3\text{CN}$  containing 0.5% DMSO respectively.

<sup>1</sup>H NMR (CDCl<sub>3</sub>, 400 MHz)

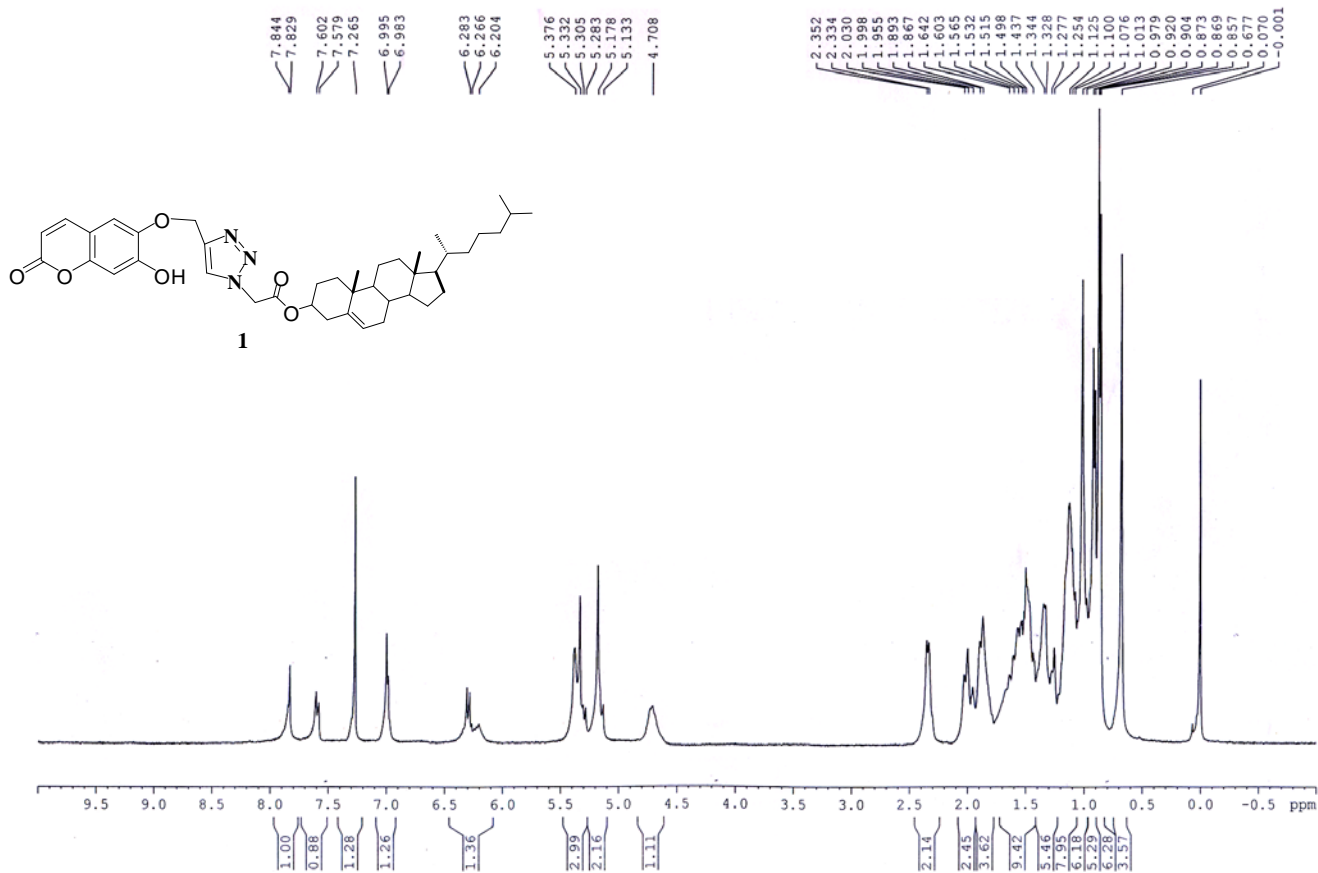

$^{13}\text{C}$  NMR ( $\text{CDCl}_3$ , 100 MHz)

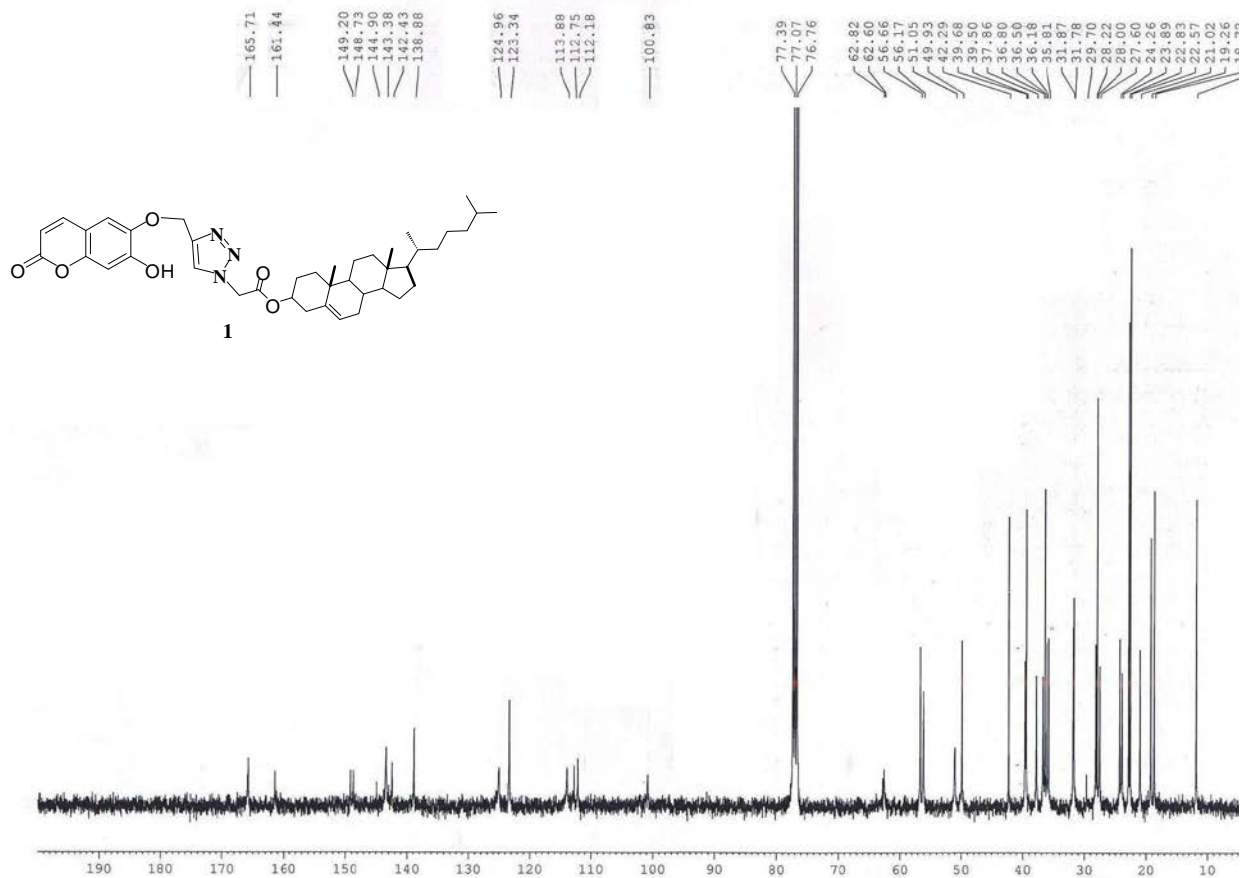



# Mass spectrum of 1.

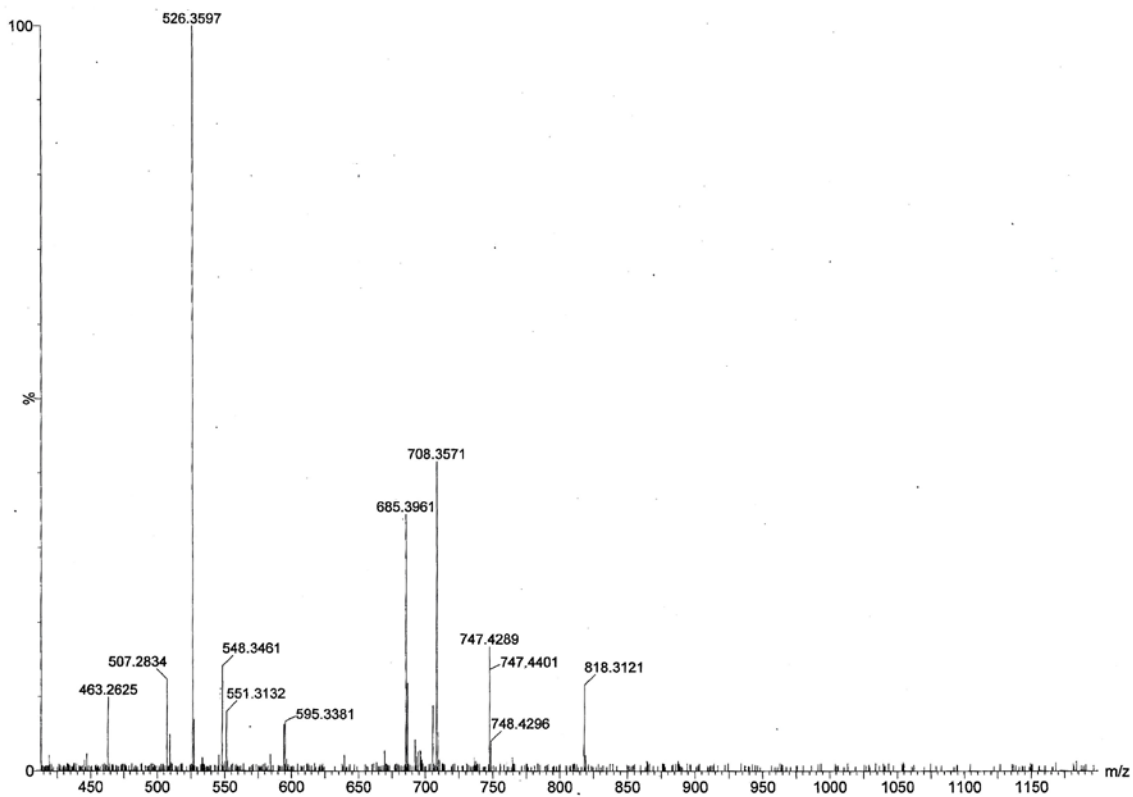

Supplement: c4ra16342g1.pdf [file c4ra16342g1.pdf]
